# Supplementary material
Source: PubMed Central journal article supplement (PMC6250073)
Supplement: NIHMS1510957-supplement-2.pdf [file NIHMS1510957-supplement-2.pdf]

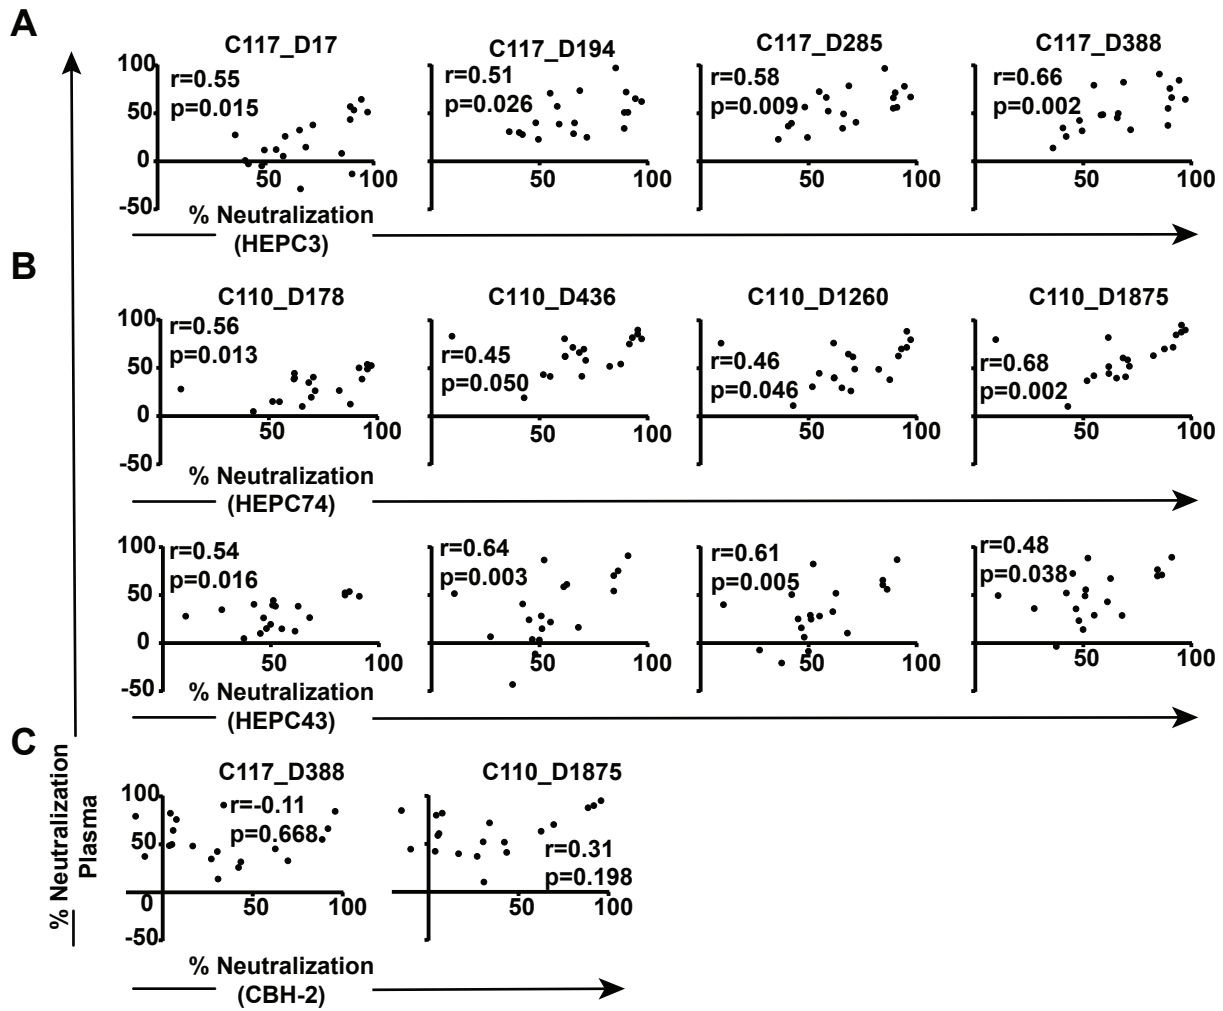

**Figure S1. Spearman correlations between neutralization profiles of C117 and C110 plasma isolates and neutralization profiles of bNAbs HEPC3, HEPC74, HEPC43, and CBH-2, related to Figure 1.** Neutralization profiles were defined using a panel of nineteen genotype 1 HCVpp. Each point indicates neutralization of a single HCVpp strain by the indicated mAb on the x-axis, and the indicated plasma sample on the y-axis. Spearman correlations ( $r$ ) and two-sided  $p$  values are indicated for each comparison. (A) C117 plasma with autologous bNAb HEPC3. (B) C110 plasma with autologous bNAbs HEPC74 (top) and HEPC43 (bottom). (C) C117 and C110 plasma correlation with negative control bNAb CBH-2.

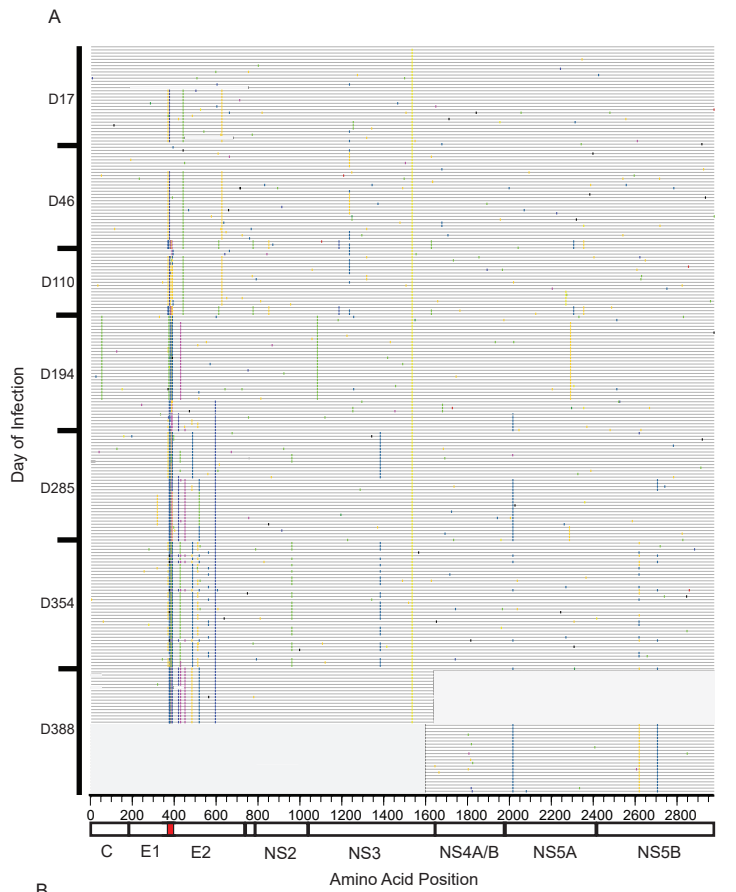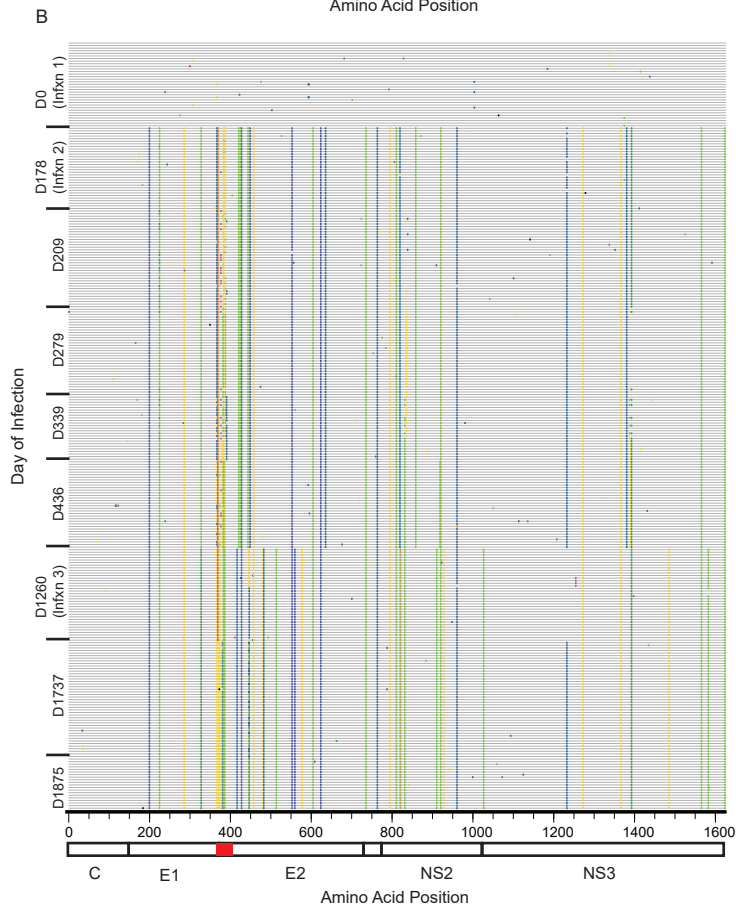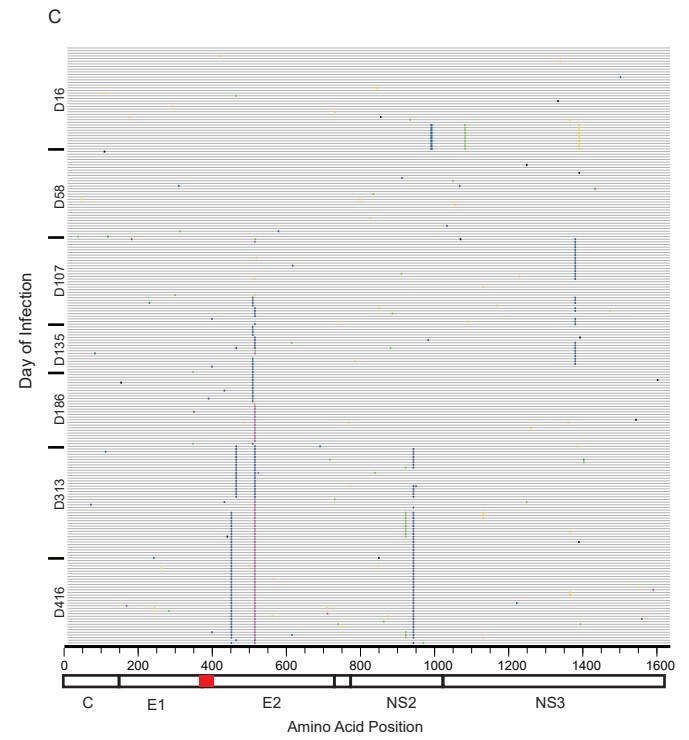

**Figure S2. Highlighter plots indicating positions of amino acid differences in longitudinal viral sequences obtained by single-genome amplification from plasma of three subjects at time points throughout the course of infection, related to Figure 2.** Amino acid differences from a master sequence are indicated by colored bars. Sequences are arranged by their date of isolation. Proteins are indicated, and hypervariable region 1 (HVR1) is highlighted in red. Numbering is relative to strain H77 polyprotein. **(A)** Full genome analysis of C117 infection. Amino acid changes relative to D17-1a53 (T/F#3) are identified. The sequence of the final circulating viral strain present immediately prior to clearance of infection was amplified in separate 5' and 3' hemigenomic reactions. **(B)** 5' hemigenomic analysis of C110 infection. Amino acid changes relative to both D0-A4 (Infxn 1) and Bole1a are identified. **(C)** 5' hemigenomic analysis of P29 infection. Amino acid changes relative to D16-B11 (T/F#1) are identified.

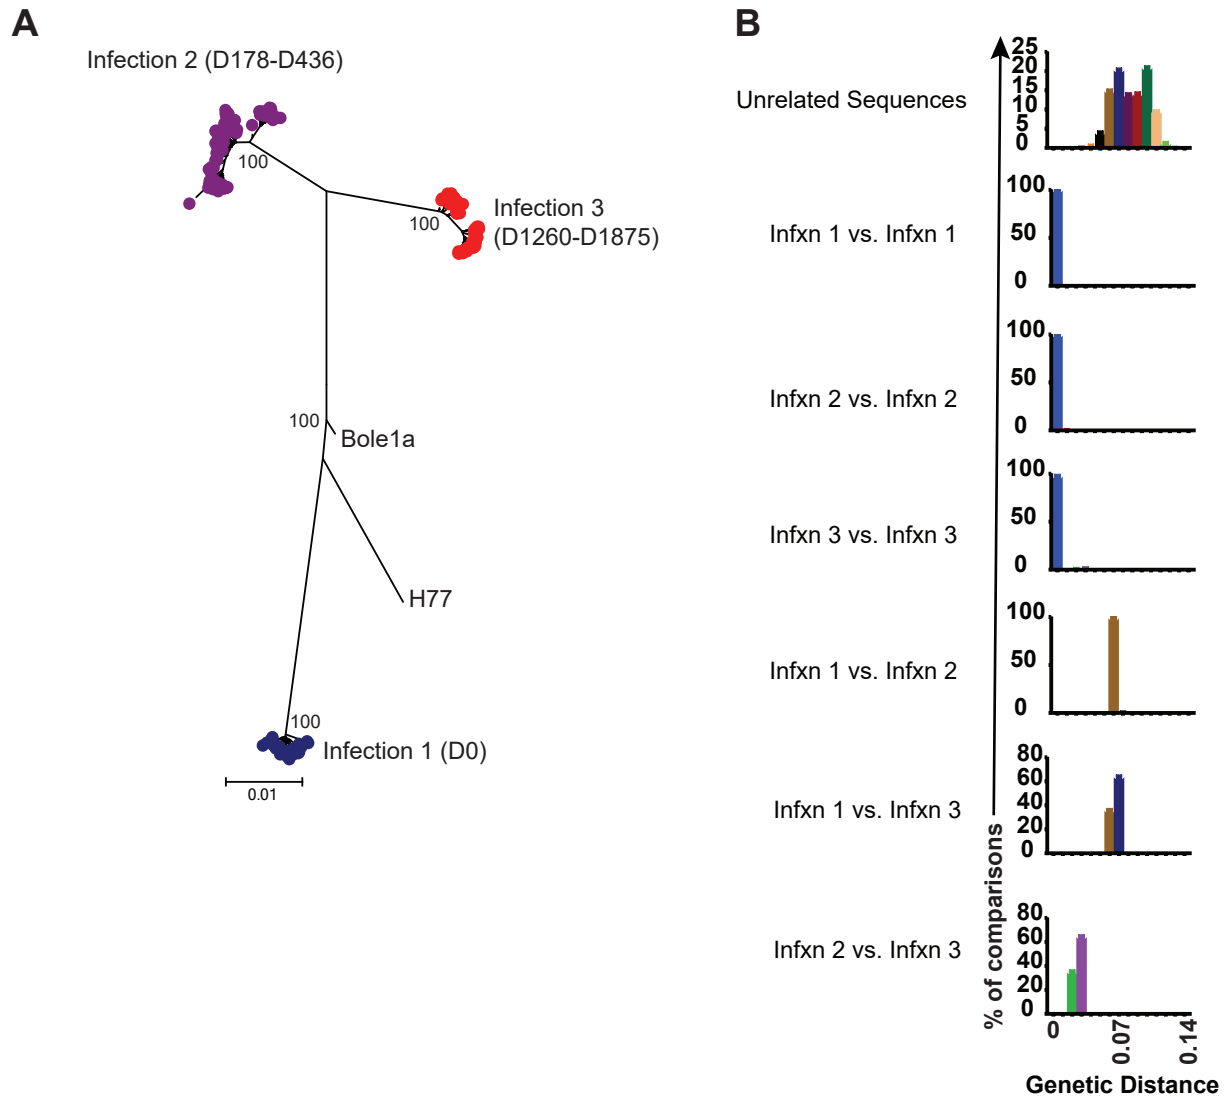

**Figure S3. C110 cleared three genetically distinct genotype 1a infections, related to Figure 2.** (A) Maximum likelihood phylogenetic tree of 5 kb hemigenomic nucleotide sequences obtained by single-genome amplification from plasma of C110 at longitudinal time points throughout the course of infection, with Bole1a and strain H77 as outgroups. Bootstrap values greater than 90 are shown. Genetically distinct infections are highlighted in different colors, with days post initial infection at the time of sampling indicated. (B) Pairwise genetic distances between 374 genotype 1a unrelated 5' nucleotide hemigenomes from GenBank, and between the indicated groups of C110 sequences.

**A**

|          | mutations introduced |     |     |     |     |     |
|----------|----------------------|-----|-----|-----|-----|-----|
|          | 434                  | 444 | 465 | 498 | 533 | 610 |
| D17-1a53 | N                    | H   | F   | P   | D   | D   |
| D17-SDM1 | .                    | .   | .   | .   | .   | H   |
| D17-SDM2 | D                    | .   | .   | .   | .   | H   |
| D17-SDM3 | D                    | .   | Y   | .   | .   | H   |
| D17-SDM4 | D                    | .   | Y   | .   | V   | H   |
| D17-SDM5 | D                    | Y   | Y   | S   | N   | H   |

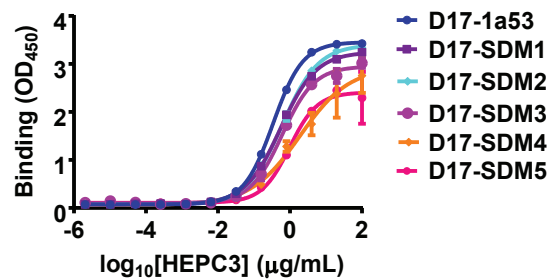

**B**

|        | mutations introduced |     |     |     |     |     |
|--------|----------------------|-----|-----|-----|-----|-----|
|        | 438                  | 442 | 445 | 461 | 466 | 475 |
| D0-A4  | L                    | F   | N   | R   | A   | A   |
| D0-SDM | I                    | I   | H   | L   | D   | T   |

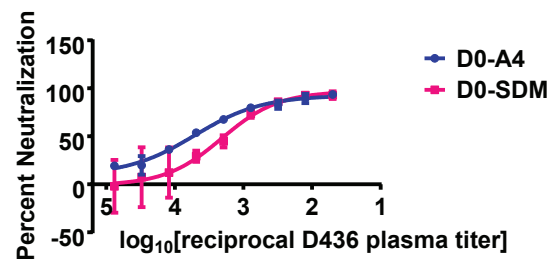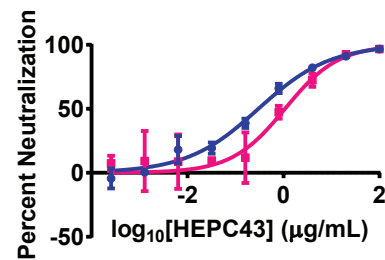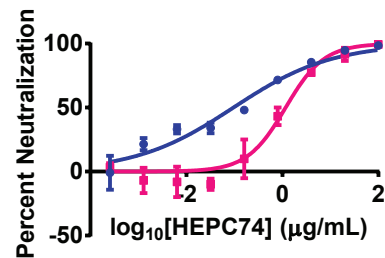

**Figure S4. Site-directed mutagenesis identifies E2 substitutions responsible for partial resistance to HEPC3 binding or HEPC43 and HEPC74 neutralization, related to Figures 3-4.** (A) Binding of serial dilutions of HEPC3 to E1E2 proteins in an ELISA. E1E2 strains tested include C117 D17-1a53 as well as this strain after introduction of the substitutions shown using site-directed mutagenesis (D17-SDM 1-5). One experiment representative of two independent experiments is shown. (B) Neutralization by C110 D436 plasma (**top**) HEPC43 (**middle**) or HEPC74 (**bottom**) of HCVpp expressing D0-A4 E1E2, or that strain after introduction of the substitutions shown (D0-SDM). One experiment representative of two independent experiments is shown.

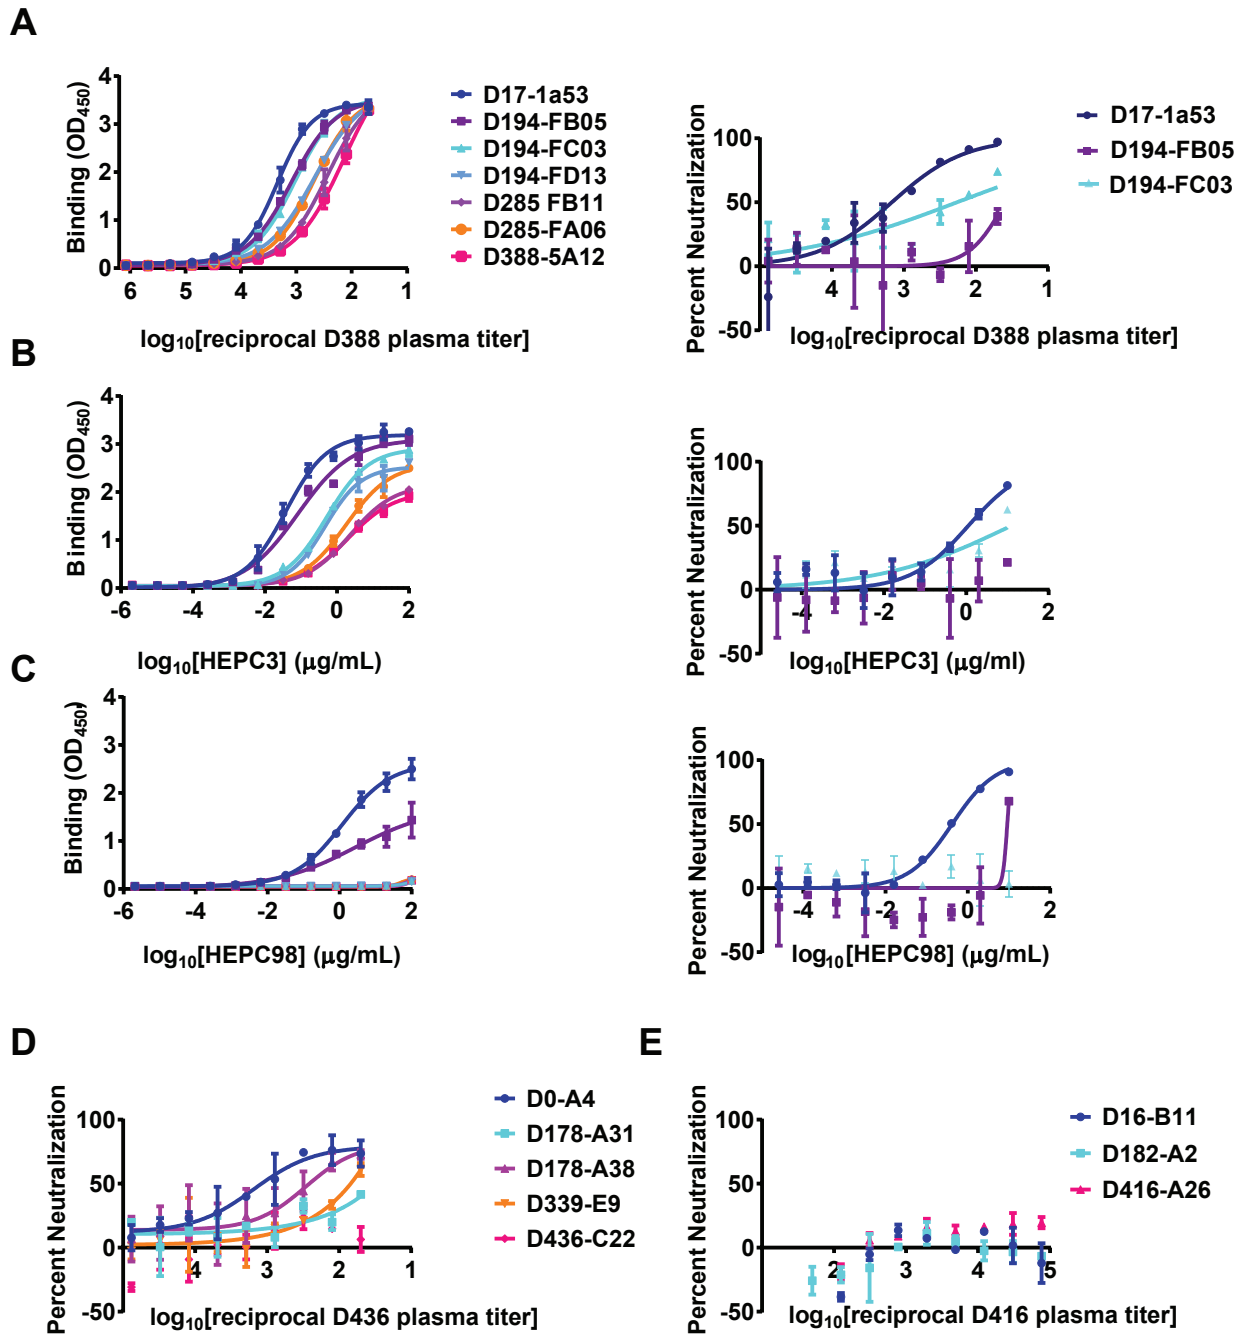

**Figure S5. Second independent experiments: naturally selected substitutions in C117 or C110 E2 confer partial resistance to autologous plasma antibodies and autologous bNabs, related to Figure 3-4.** (A-C) Binding to longitudinal C117 E1E2 proteins (left) or neutralization of longitudinal C117 HCVpp (right) by C117 D388 plasma IgG (A), HEPC3 (B) or HEPC98 (C). (D) Neutralization of longitudinal C110 HCVpp from Infxn 1 and 2 by C110 D436 plasma. (E) Neutralization of P29 HCVpp by P29 D416 plasma. All assays were performed in duplicate, and values are means +/- SD.

**A**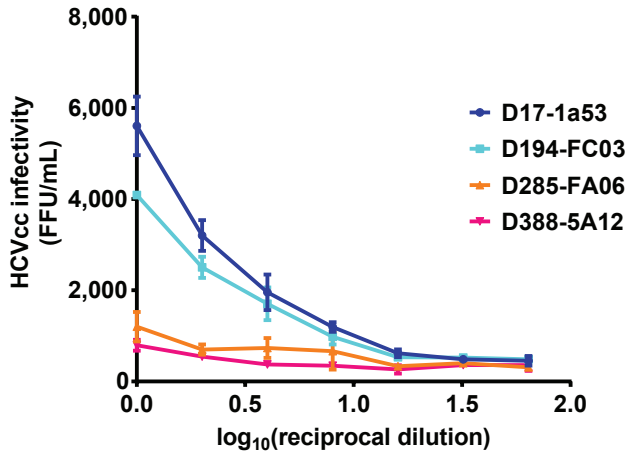**B**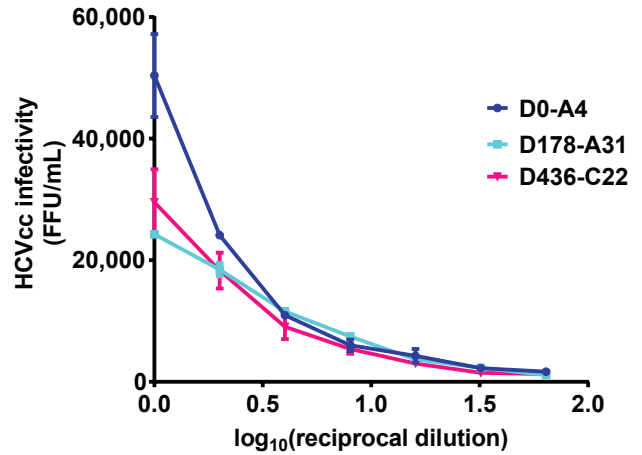

**Figure S6. Second independent experiment: infectivity of serial dilutions of chimeric replication competent cell culture virus (HCVcc) expressing longitudinal (A) C117 or (B) C110 E1E2 strains, measured as focus forming units/mL (FFU/mL) in Huh7.5.1 cells 48 hours after inoculation, related to Figure 5. Values are normalized for input HCV viral copy number. Assays were performed in duplicate, and values are means +/- SD.**

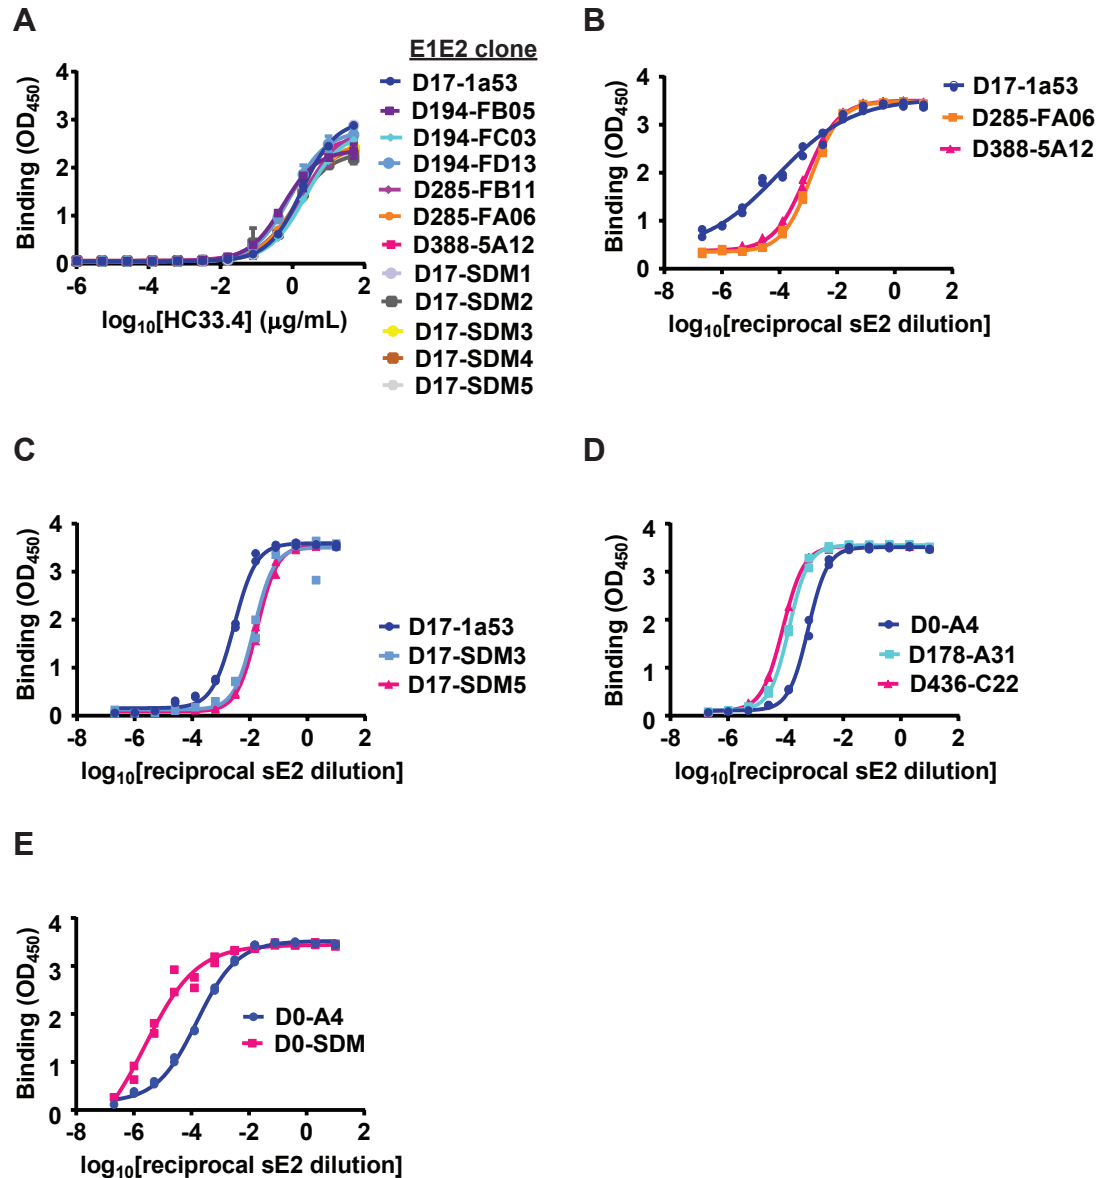

**Figure S7. Relative quantitation of E1E2 and sE2 proteins, related to Figures 3 and 6.** (A) Lysates of cells transfected with E1E2 expression plasmids were used to coat ELISA wells, then incubated with serial dilutions of control bNAb HC33.4. This bNAb binds to a linear, non-conformational epitope that is intact in all strains, so level of binding is proportional to the protein concentration. (B-E) Serial dilutions of sE2 supernatants were plated in ELISA wells and detected with anti-His antibody. Relative protein concentration in different supernatants were estimated from relative  $EC_{50}$  values of anti-His binding, and supernatants were adjusted to equivalent sE2 concentrations prior to CD81 and SR-B1 binding experiments. (B) C117 natural sE2 strains. (C) C117 SDM sE2 strains. (D) C110 natural sE2 strains. (E) C110 SDM sE2 strains.

**Table S1. HCV substitutions arising over the course of C117, C110, and P29 infections.** Changes away from (black text) or toward (blue text) the Bole1a sequence are indicated. \*Only changes away from Bole1a are shown. Related to Fig 2.

| Subject | Viral strains compared                           | Core-E1 | E2    |             |            | P7-NS5B |
|---------|--------------------------------------------------|---------|-------|-------------|------------|---------|
|         |                                                  |         | HVR1  | front layer | E2 (other) |         |
| C117    | D17-1a53 T/F#3 →<br>D388-5A12                    |         | G390D | N434D       | F465Y      | H2030Q  |
|         |                                                  |         | Q391R | H444Y       | P498S      | N2633S  |
|         |                                                  |         | Y394R |             | D533N      | R2720Q  |
|         |                                                  |         | T395A |             | D610H      |         |
|         |                                                  |         | L402F |             |            |         |
|         |                                                  | T404N   |       |             |            |         |
| C110    | D0-A4 (Infxn1) →<br>D178-A31 T/F#5<br>(Infxn 2)* | A217D   | E384K | L438I       | R461L      | I753V   |
|         |                                                  | V242I   | H386Y | F442I       | A466D      | K781R   |
|         |                                                  | D303G   | V387T | N445H       | A475T      | T812A   |
|         |                                                  | L345V   | T388S |             | V570D      | A828V   |
|         |                                                  |         | G401S |             | I622V      | R837N   |
|         |                                                  |         | P405S |             | E641D      | L876I   |
|         |                                                  |         |       |             | D653N      | I938L   |
|         |                                                  |         |       |             |            | P978R   |
|         |                                                  |         |       |             |            | K1250Q  |
|         |                                                  |         |       |             |            | P1290S  |
|         |                                                  |         |       |             |            | V1384A  |
|         |                                                  |         |       |             |            | K1398R  |
|         |                                                  |         |       |             |            | L1410M  |
|         |                                                  |         |       |             |            | F1583L  |
|         |                                                  |         |       | I1641V      |            |         |
| C110    | D178-A31 T/F#5 →<br>D436-C22 (Infxn 2<br>only)   |         | K384G |             |            | F849L   |
|         |                                                  |         | T387I |             |            | M936V   |
|         |                                                  |         | A397S |             |            | V1408G  |
|         |                                                  |         | F399L |             |            |         |
|         |                                                  |         | A400V |             |            |         |
|         |                                                  |         | F403L |             |            |         |
|         |                                                  | S405P   |       |             |            |         |
| C110    | D0-A4 (Infxn 1) →<br>D1260-B3 (Infxn 3)*         | A217D   | E384G | N434K       | D464K      | I753V   |
|         |                                                  | V242I   | H386Y | N445H       | A475T      | K781R   |
|         |                                                  | D303G   | T388S |             | P498A      | T812A   |
|         |                                                  | L345M   | S391A |             | K500Q      | A828V   |
|         |                                                  |         | A400V |             | E531V      | R837S   |
|         |                                                  |         | F403L |             | V570D      | Y838H   |
|         |                                                  |         | S404A |             | T577D      | F849L   |
|         |                                                  |         |       |             | S595A      | M928I   |
|         |                                                  |         |       |             | I622V      | I938L   |
|         |                                                  |         |       |             | E641D      | T945A   |
|         |                                                  |         |       |             |            | P978R   |
|         |                                                  |         |       |             |            | I1044V  |
|         |                                                  |         |       |             |            | P1290S  |
|         |                                                  |         |       |             |            | V1384A  |
|         |                                                  |         |       | L1410M      |            |         |
|         |                                                  |         |       | A1503T      |            |         |
|         |                                                  |         |       | F1583L      |            |         |
|         |                                                  |         |       | P1600L      |            |         |
|         |                                                  |         |       | I1641V      |            |         |
| C110    | D1260-B3 →<br>D1875-C3<br>(Infxn 3 only)         |         | Y386H |             | T463V      | K1250R  |
|         |                                                  |         | G398R |             |            |         |
| P29     | D16-B11 T/F#1 →<br>D416-A26                      |         |       |             | T463N      | N958D   |
|         |                                                  |         |       |             | Y527F      | T985I   |



| Residue (H77,1b09) | HEPC3 contact | HEPC74 contact | HEPC3 binding (H77) | HEPC74 binding (H77) | HEPC43 binding (H77) | CD81LEL binding (H77) | HEPC98 binding (H77) |
|--------------------|---------------|----------------|---------------------|----------------------|----------------------|-----------------------|----------------------|
| L402               |               |                |                     |                      |                      |                       | X                    |
| P,S405             |               |                |                     |                      |                      |                       | X                    |
| K,S408             |               |                |                     |                      |                      |                       | X                    |
| I414               | X             |                |                     |                      |                      |                       |                      |
| N417               | X             |                |                     |                      |                      |                       |                      |
| G418               | X             |                |                     |                      |                      |                       |                      |
| S419               | X             |                |                     |                      |                      |                       |                      |
| W420               |               |                |                     |                      |                      | X                     |                      |
| H421               |               | X              |                     |                      |                      |                       |                      |
| I422               |               |                |                     |                      |                      | X                     |                      |
| S,R424             |               |                | X                   | X                    | X                    |                       |                      |
| T425               |               |                | X                   | X                    | X                    | X                     |                      |
| L427               | X             | X              | X                   | X                    | X                    | X                     |                      |
| N428               | X             |                | X                   | X                    | X                    | X                     |                      |
| C429               | X             |                | X                   | X                    | X                    | X                     |                      |
| N430               | X             | X              |                     |                      |                      |                       |                      |
| E,D431             | X             | X              |                     |                      |                      |                       |                      |
| N,H434             | X             | X              |                     | X                    |                      |                       |                      |
| T435               | X             | X              |                     |                      |                      |                       |                      |
| G436               | X             | X              | X                   | X                    | X                    |                       |                      |
| W,F437             |               | X              | X                   | X                    | X                    | X                     |                      |
| L438               | X             | X              | X                   | X                    | X                    | X                     |                      |
| A439               | X             | X              |                     |                      |                      |                       |                      |
| G,A440             | X             | X              | X                   |                      |                      | X                     |                      |
| L441               |               |                | X                   |                      | X                    | X                     |                      |
| F442               | X             | X              | X                   |                      |                      | X                     |                      |
| Y443               | X             | X              |                     |                      |                      | X                     |                      |
| H445               |               | X              |                     |                      |                      |                       |                      |
| K446               | X             | X              |                     |                      |                      |                       |                      |
| F447               | X             | X              |                     |                      |                      |                       |                      |
| D448               | X             | X              |                     |                      |                      |                       |                      |
| R455               |               |                |                     | X                    |                      |                       |                      |
| A499               |               |                | X                   | X                    | X                    |                       |                      |
| C503               |               |                | X                   | X                    | X                    | X                     |                      |
| V515               |               |                |                     | X                    | X                    |                       |                      |
| G517               |               |                | X                   |                      |                      |                       |                      |
| T518               |               |                | X                   | X                    | X                    | X                     |                      |
| T519               |               |                |                     | X                    | X                    |                       |                      |
| D520               |               |                | X                   | X                    | X                    | X                     |                      |
| G523               |               |                |                     | X                    | X                    |                       |                      |
| Y527               |               |                |                     |                      |                      | X                     |                      |
| W529               | X             | X              | X                   |                      |                      | X                     |                      |
| G530               |               |                | X                   | X                    | X                    |                       |                      |
| A,E531             | X             | X              |                     |                      |                      |                       |                      |
| D535               |               |                | X                   | X                    | X                    | X                     |                      |
| W616               |               |                | X                   | X                    |                      | X                     |                      |
| C620               |               |                |                     |                      |                      | X                     |                      |
| I626               |               |                |                     |                      | X                    |                       |                      |
| T647               |               |                |                     |                      | X                    |                       |                      |

**Table S2. E2-contact and/or critical binding residues of HEPC3, HEPC74, HEPC43, HEPC98, and CD81LEL.**

Positions identified as contact residues displayed  $> 10 \text{ \AA}^2$  of buried surface area in the bNAb-1b09<sub>ecto</sub> complex crystal structure. Binding residues for bNAbs and CD81LEL were identified by alanine scanning as described in Methods. Red: Contact and/or binding residues shared by any bNAb and CD81LEL. Related to Fig 7.

**Table S3. T cell interferon gamma responses to overlapping peptides spanning the entire HCV polyprotein.** Related to Fig 2.

| <b>Subject</b> | <b>Days post-infection</b> | <b>HCV amino acid position</b> | <b>Viral protein</b> | <b>Sequence recognized (# aa)</b> |
|----------------|----------------------------|--------------------------------|----------------------|-----------------------------------|
| <b>C117</b>    | 46                         | No detectable T cell responses |                      |                                   |
|                | 110                        | No detectable T cell responses |                      |                                   |
|                | 194                        | No detectable T cell responses |                      |                                   |
|                | 285                        | No detectable T cell responses |                      |                                   |
| <b>C110</b>    | 912                        | No detectable T cell responses |                      |                                   |
|                | 1009                       | No detectable T cell responses |                      |                                   |
|                | 1267                       | 1169-1177                      | NS3                  | LLCPAGHAV (9)                     |
|                | 1267                       | 1243-1258                      | NS3                  | AYAAQGYKVLVLNPSV (16)             |
|                | 1267                       | 1983-1998                      | NS5A                 | WICEVLSDFKTWLKAK (16)             |
|                | 1267                       | 1987-1995                      | NS5A                 | VLSDFKTWL (9)                     |
|                | 1267                       | 2526-2539                      | NS5B                 | KDVRCHARKAVAHI (14)               |
|                | 1267                       | 2903-2918                      | NS5B                 | NRVAACLRLKLGVPPLR (16)            |
| <b>P29</b>     | 58                         | 1073-1081                      | NS3                  | CINGVCWTV (9)                     |
|                | 114                        | 1073-1081                      | NS3                  | CINGVCWTV (9)                     |
|                | 135                        | 512-527                        | E2                   | SPVVVGTTDRSGAPTY (16)             |
|                | 135                        | 1073-1081                      | NS3                  | CINGVCWTV (9)                     |
|                | 135                        | 1395-1403                      | NS3                  | HSKKKCDEL (9)                     |
